# Supplementary material for: A Henry's law method for generating bulk nanobubbles
Source: Royal Society of Chemistry journal article supplement (doi:10.1039/d0nr03332d), 2020-01-01
Supplement: d0nr03332d2.pdf [file d0nr03332d2.pdf]

**Supporting Information for**

**A Henry's Law Method for Generating Bulk Nanobubbles**

**Gianluca Ferraro, Ananda J. Jadhav, Mostafa Barigou✉**

School of Chemical Engineering, University of Birmingham, Edgbaston,  
Birmingham B15 2TT, United Kingdom

### FT-IR analysis

FT-IR is a non-destructive, quantitative, and quick method for identifying a wide range of chemical constituents and elucidating compound structures in various forms in real-world samples according to the vibrational modes of their molecular functional groups. FT-IR spectroscopic measurements were used here to investigate the purity of bulk nanobubble suspensions produced in pure water. Spectroscopic measurements were performed on a Tensor 27 instrument (Bruker, Germany) coupled with an ATR accessory. The scanned spectral range was from 400–4000  $\text{cm}^{-1}$ , with a resolution of 2  $\text{cm}^{-1}$  and a wavenumber accuracy of 0.01  $\text{cm}^{-1}$ .

### Raman analysis

Raman spectroscopy data for pure water and bulk nanobubble suspensions were collected using an inVia Qontor Confocal Raman microscope (Renishaw, UK). Each scan had a 30 s acquisition time using a 532 nm laser at 10% power achieved using a pinhole aperture. Each spectrum was obtained using the average of three acquisitions between 100–4000  $\text{cm}^{-1}$ .

### GC analysis

GC analysis of water and BNB suspensions was performed with an Agilent 7890A gas chromatograph (Agilent Technology, UK) equipped with ZB-WAX column (30 m  $\times$   $\phi$  0.25 mm, thickness 0.25  $\mu\text{m}$ , Phenomenex, UK). Helium was used as a carrier and make-up gas passed through the column at a constant flow rate of 1.0  $\text{mL}\cdot\text{min}^{-1}$ . The injection volume was 1  $\mu\text{L}$ , which was used with a split ratio of 1:10. The column temperature programme was as follows: temperature was held at 50  $^{\circ}\text{C}$  for 2 min, increased to 250  $^{\circ}\text{C}$  at 5  $^{\circ}\text{C}\cdot\text{min}^{-1}$  and then held at 250  $^{\circ}\text{C}$  for 18 min. The GC operating parameters are summarized in Table S1.

Table S1. GC operating parameters.

| Gas chromatography        |                                                                                                                           |
|---------------------------|---------------------------------------------------------------------------------------------------------------------------|
| Instrument                | 7809A (Agilent)                                                                                                           |
| Column                    | ZB–WAX 30 m $\times$ $\phi$ 0.25 mm, 0.25 $\mu\text{m}$ (Phenomenex, UK)                                                  |
| Injection method          | Split (1:10)                                                                                                              |
| Injection volume          | 1 $\mu\text{L}$                                                                                                           |
| Carrier gas               | Helium                                                                                                                    |
| Flow rate                 | 1 $\text{mL}\cdot\text{min}^{-1}$                                                                                         |
| Injection temperature     | 250 $^{\circ}\text{C}$                                                                                                    |
| Oven temperature program  | 50 $^{\circ}\text{C}$ (2 min) $\rightarrow$ 5 $^{\circ}\text{C}/\text{min}$ $\rightarrow$ 250 $^{\circ}\text{C}$ (18 min) |
| Transfer line temperature | 250 $^{\circ}\text{C}$                                                                                                    |

## ICP-MS analysis

A NexION 300X ICP-MS spectrometer (Perkin-Elmer, UK) equipped with a cyclonic spray chamber and a SeaSpray concentric nebulizer was used to analyse pure water and BNB suspensions for the presence of any trace metal/nonmetal particles. The ICP-MS operating parameters are summarised in Table S2. In order to quantify the analytical results of ICP-MS, the internal and external standard additions modes were used. All standards were prepared in a 2% aqueous solution of HNO<sub>3</sub>. Single element stock solutions (Sigma Aldrich, UK) of 20 metal/nonmetal elements, namely Na, Mg, Al, Si, P, K, Ca, Ti, V, Cr, Mn, Fe, Co, Ni, Cu, Zn, Rb, Sr, Zr, and Hg at a 1000 ppm concentration were used to prepare the standards for external calibration. The calibration curve and corresponding correlation coefficient ( $R^2 > 0.99$ ) for each element used are presented in the Figures S2–S3. Indium at 1 ppm was employed as internal standard. Pure water and BNB suspensions were acidified using 2 % HNO<sub>3</sub> prior to ICP-MS sampling. Samples were supplied to the nebulizer in continuous mode with the spectrometer peristaltic pump using flared end PVC-based tubing of 0.19 mm internal diameter.

Table S2. ICP-MS operating parameters.

| Parameter                       | Value                    |
|---------------------------------|--------------------------|
| RF applied power (kW)           | 1.6 kW                   |
| Auxiliary gas flow rate (Argon) | 1.2 L.min <sup>-1</sup>  |
| Plasma gas flow (Argon)         | 18 L.min <sup>-1</sup>   |
| Nebulizer gas flow (Argon)      | 0.95 L.min <sup>-1</sup> |
| Sample flow rate                | 0.3 mL.min <sup>-1</sup> |
| KED Gas Flow (Helium)           | 4 mL.min <sup>-1</sup>   |
| Nebulizer type                  | Sea Spray concentric     |
| Interface cone material         | Nickel                   |
| Analog stage voltage            | -1675                    |
| Pulse stage voltage             | 1050 V                   |
| Discriminator threshold         | 12 mV                    |
| Deflector voltage               | - 10 V                   |
| Quadrupole rod offset           | - 12 V                   |
| Cell entrance voltage           | - 9 V                    |
| Cell exit voltage               | - 20 V                   |
| Cell rod offset                 | - 15 V                   |
| Axial field voltage             | 475 V                    |

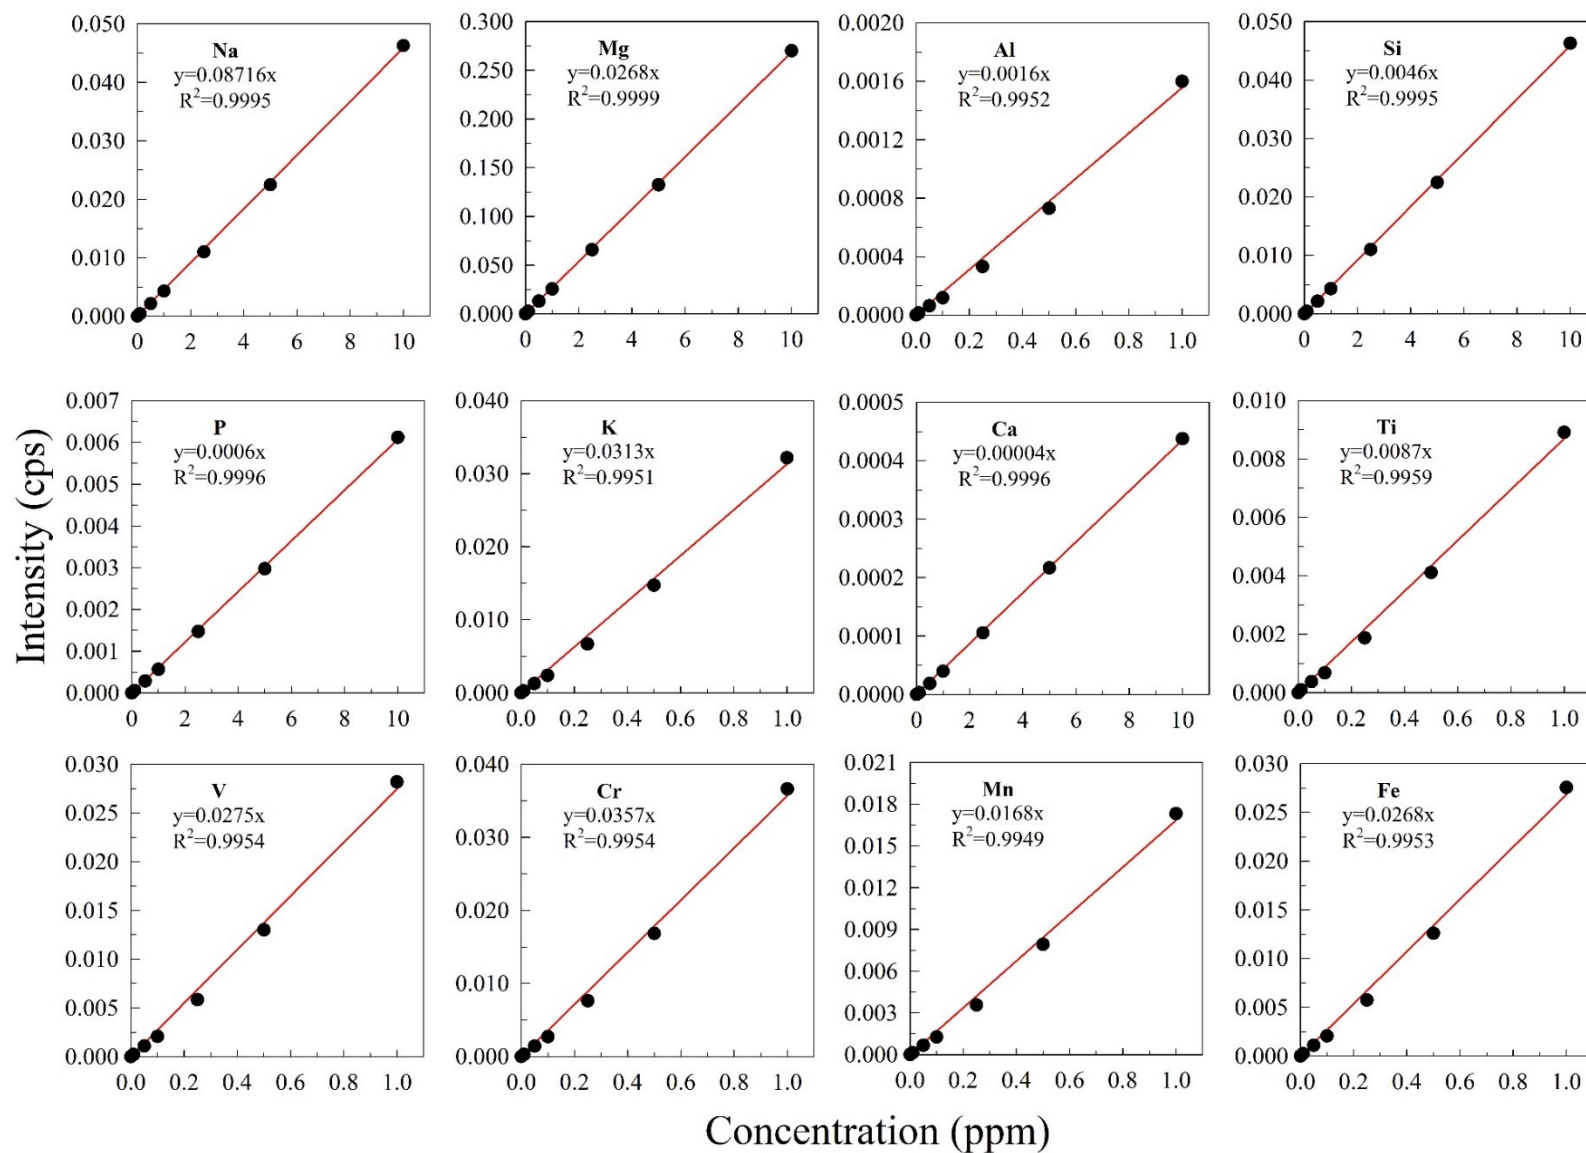

Figure S1. Calibration curves for individual elements (Na, Mg, Al, Si, P, K, Ca, Ti, V, Cr, Mn, Fe) measured by ICP-MS with solution-based calibration (standard additions mode).

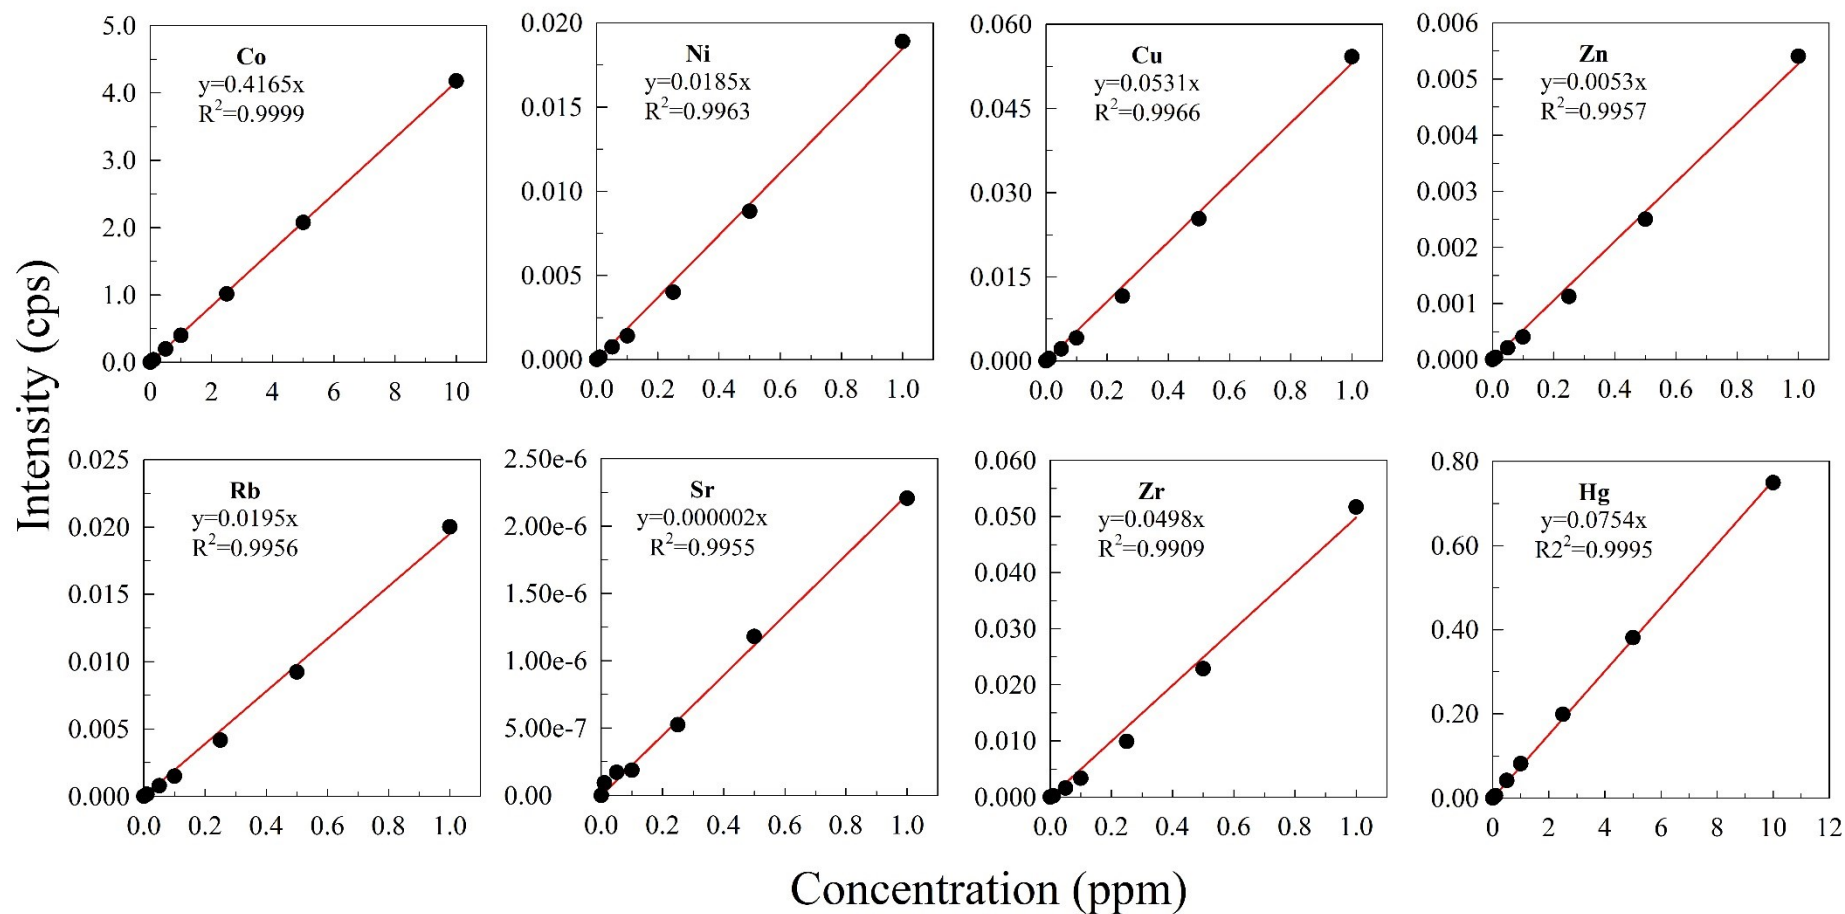

Figure S2. Calibration curves for individual elements (Co, Ni, Cu, Zn, Rb, Sr, Zr, Hg) measured by ICP-MS with solution-based calibration (standard additions mode).

Table S3. Concentration (in ppm) of detected elements in pure water and in BNB suspensions measured using ICP-MS.

| Element | System     |                            |
|---------|------------|----------------------------|
|         | Pure water | Bulk nanobubble suspension |
| Na      | 0.001721   | 0.004647                   |
| Mg      | 0.003409   | 0.004647                   |
| Al      | 0.001494   | 0.002780                   |
| Si      | 0.006619   | 0.726000                   |
| P       | 0.000187   | 0.001482                   |
| K       | 0.000831   | 0.001480                   |
| Ca      | 0.001951   | 0.018370                   |
| Ti      | 0.000023   | 0.000346                   |
| V       | 0.000136   | 0.000084                   |
| Cr      | 0.000011   | 0.000131                   |
| Mn      | 0.000042   | 0.000106                   |
| Fe      | 0.004652   | 0.001010                   |
| Co      | 0.000405   | 0.000033                   |
| Ni      | 0.000113   | 0.002780                   |
| Cu      | 0.000010   | 0.001480                   |
| Zn      | 0.000207   | 0.000346                   |
| Rb      | 0.000146   | 0.000084                   |
| Sr      | 0.000169   | 0.000131                   |
| Zr      | 0.000165   | 0.000106                   |
| Hg      | 0.037039   | 0.009754                   |
